# Supplementary material for: GLH/VASA helicases promote germ granule formation to ensure the fidelity of piRNA-mediated transcriptome surveillance
Source: PubMed Central journal article supplement (PMC9463143; doi:10.1038/s41467-022-32880-2), 2022-09-09
Supplement: 41467_2022_32880_MOESM1_ESM.pdf [file 41467_2022_32880_MOESM1_ESM.pdf]

**GLH/VASA helicases promote germ granule formation to ensure the fidelity of piRNA-mediated transcriptome surveillance**

Wenjun Chen<sup>1, 2†</sup>, Jordan S Brown<sup>1†</sup>, Tao He<sup>3</sup>, Wei-Sheng Wu<sup>4</sup>, Shikui Tu<sup>5</sup>, Zhiping Weng<sup>6</sup>, Donglei Zhang<sup>2\*</sup>, and Heng-Chi Lee<sup>1\*</sup>

**Supplementary Information**

**a**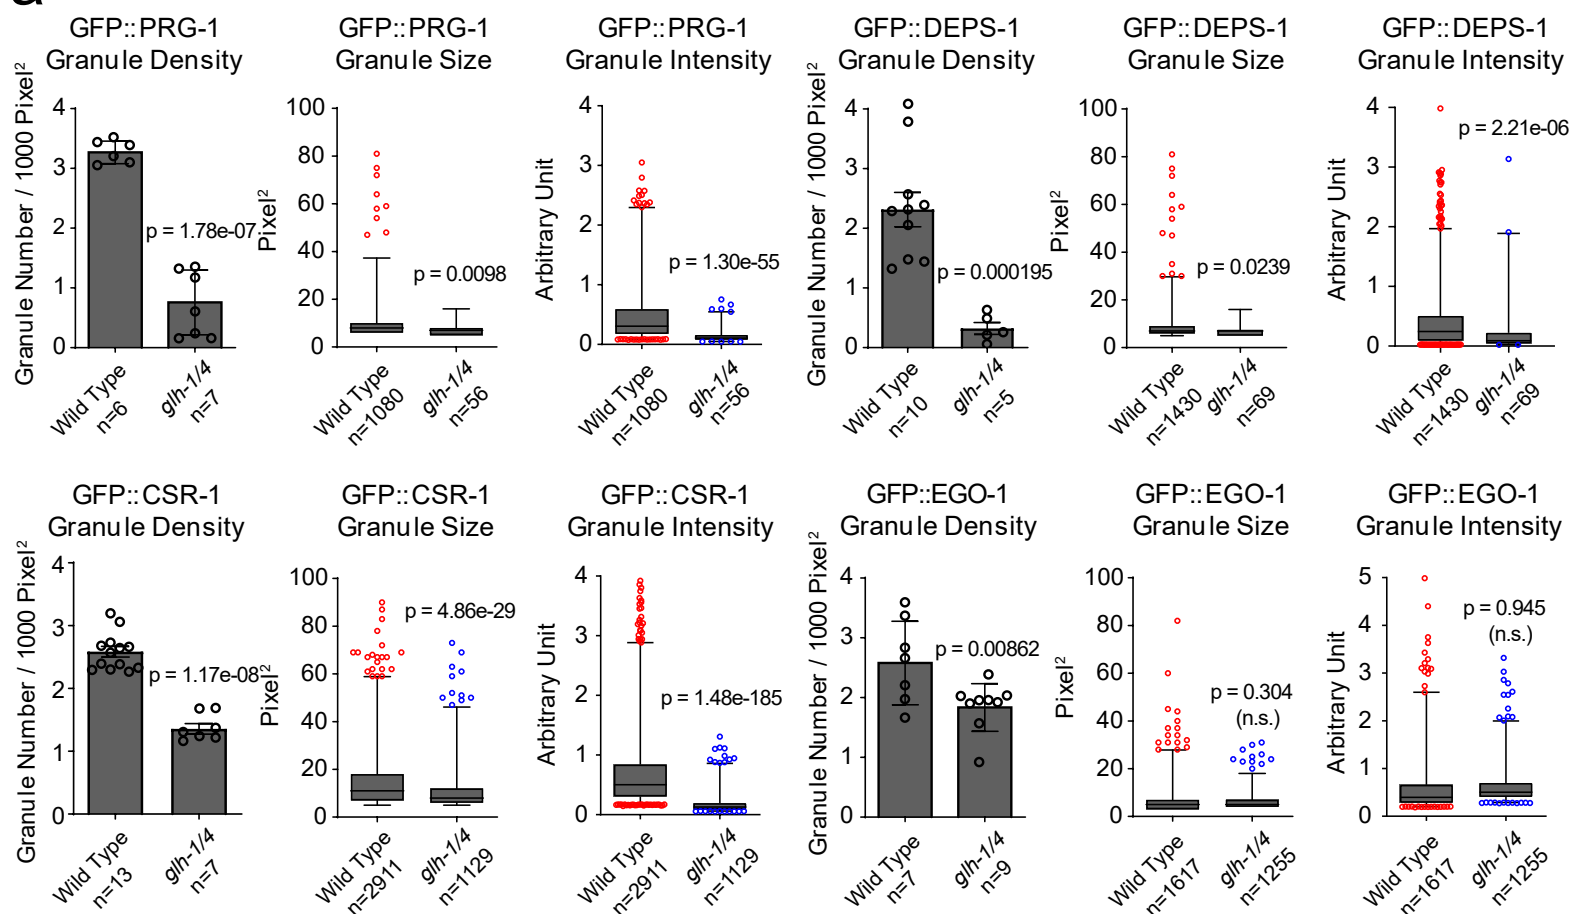**b**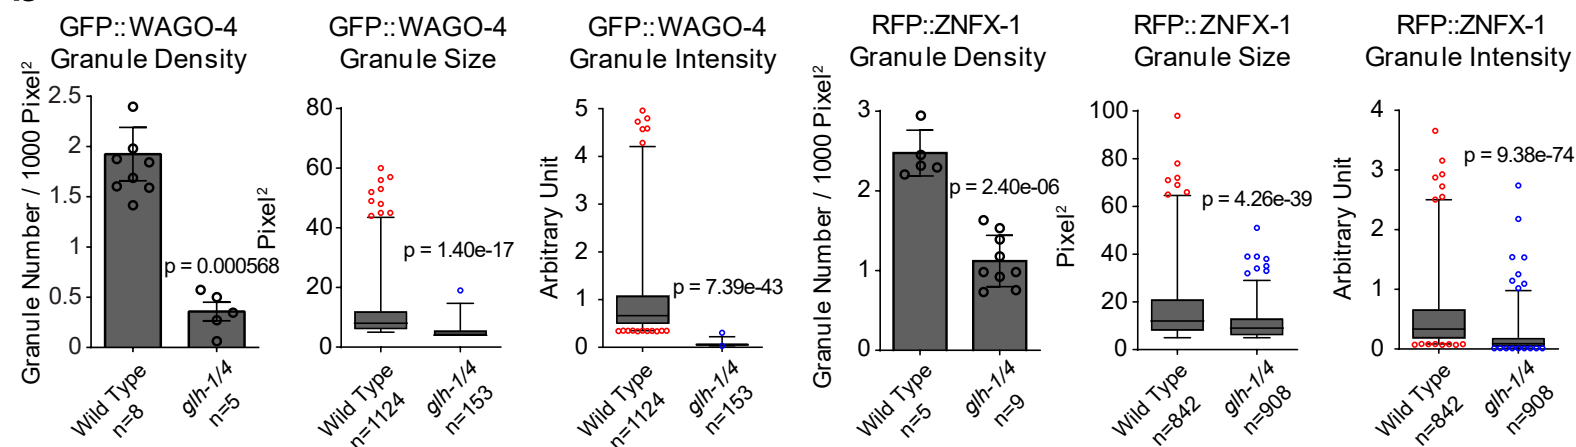**c**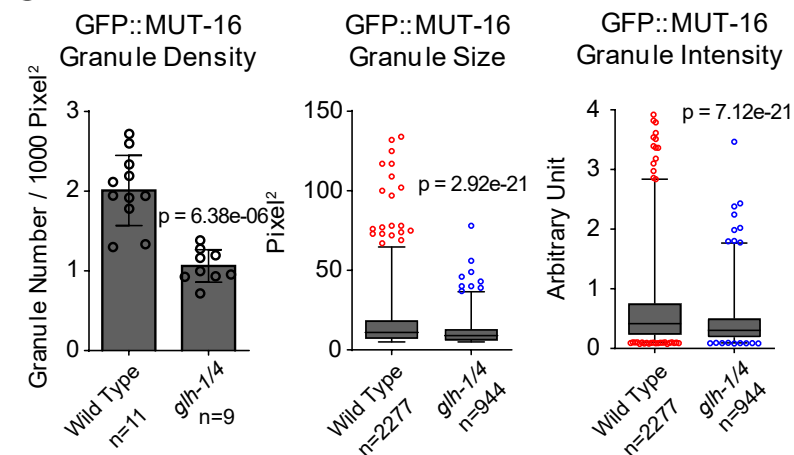

### Supplementary Fig. 1. Image analyses corresponding to Figure 1A-C

- a) Granule density, size, and intensity quantification of proteins known to be enriched in P granules in the wild type or the *glh-1 glh-4* mutant, corresponding to micrographs in Figure 1b. Statistical analysis was performed using a one-tailed Student's t-test. Bars indicate the mean, errors bars indicate the standard deviation, and data points indicate values for individual worms (density) or granules (size and intensity) from each genotype. N values indicate number of worms (density) or granules (size and intensity) examined.
- b) Granule density, size, and intensity quantification of proteins known to be enriched in Z granules in the wild type or the *glh-1 glh-4* mutant, corresponding to micrographs in Figure 1c. Statistical analysis was performed using a one-tailed Student's t-test. Bars indicate the mean, errors bars indicate the standard deviation, and data points indicate values for individual worms (density) or granules (size and intensity) from each genotype. N values indicate number of worms (density) or granules (size and intensity) examined.
- c) Granule density, size, and intensity quantification of proteins known to be enriched in mutator granules in the wild type or the *glh-1 glh-4* mutant, corresponding to micrographs in Figure 1d. Each bar represents n = 8~10 worms. Statistical analysis was performed using a one-tailed Student's t-test. Bars indicate the mean, errors bars indicate the standard deviation, and data points indicate values for individual worms (density) or granules (size and intensity) from each genotype. N values indicate number of worms (density) or granules (size and intensity) examined.

**a**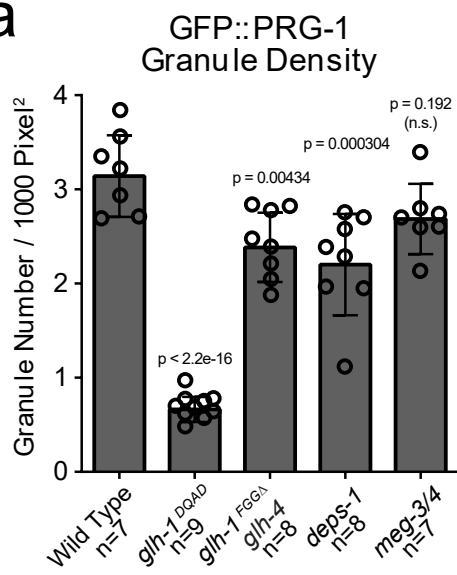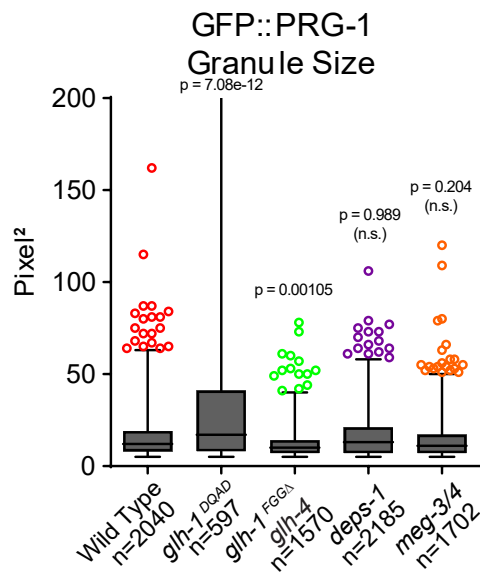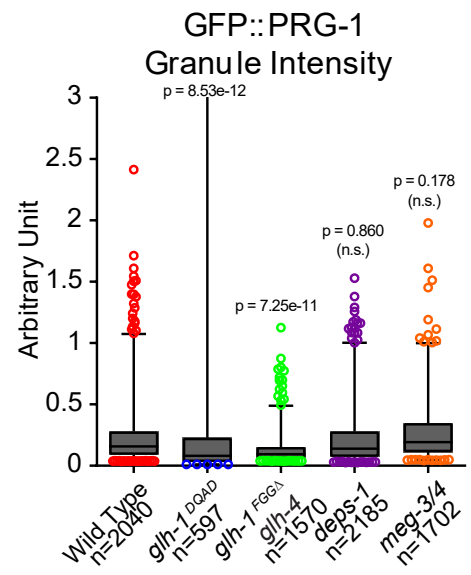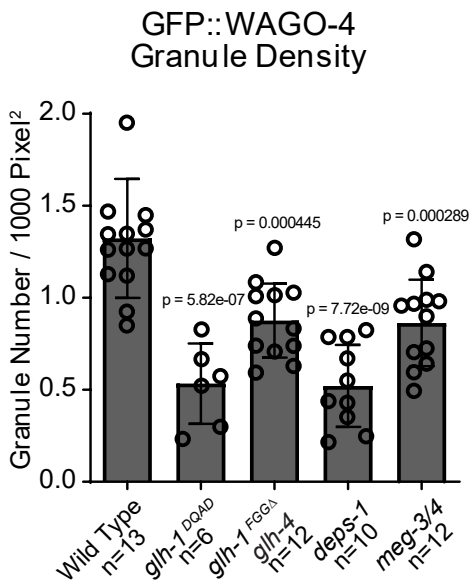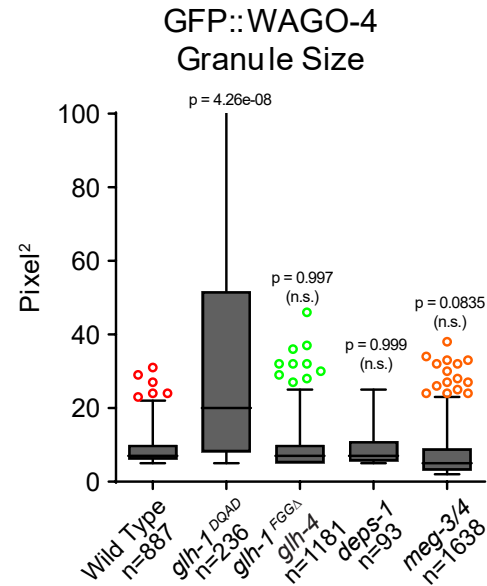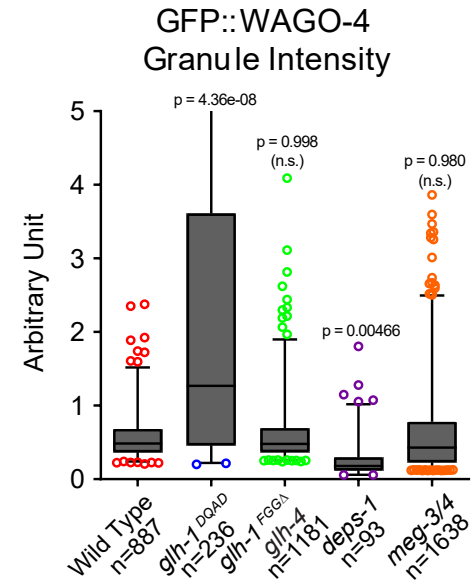**b****GFP::PRG-1**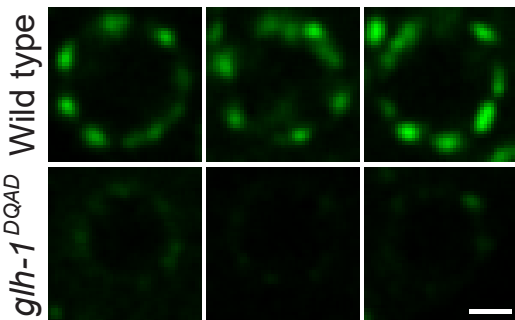**GFP::WAGO-4**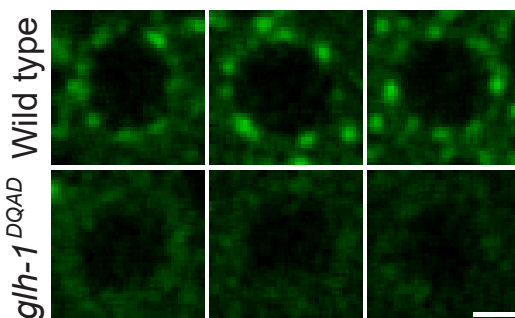

**C**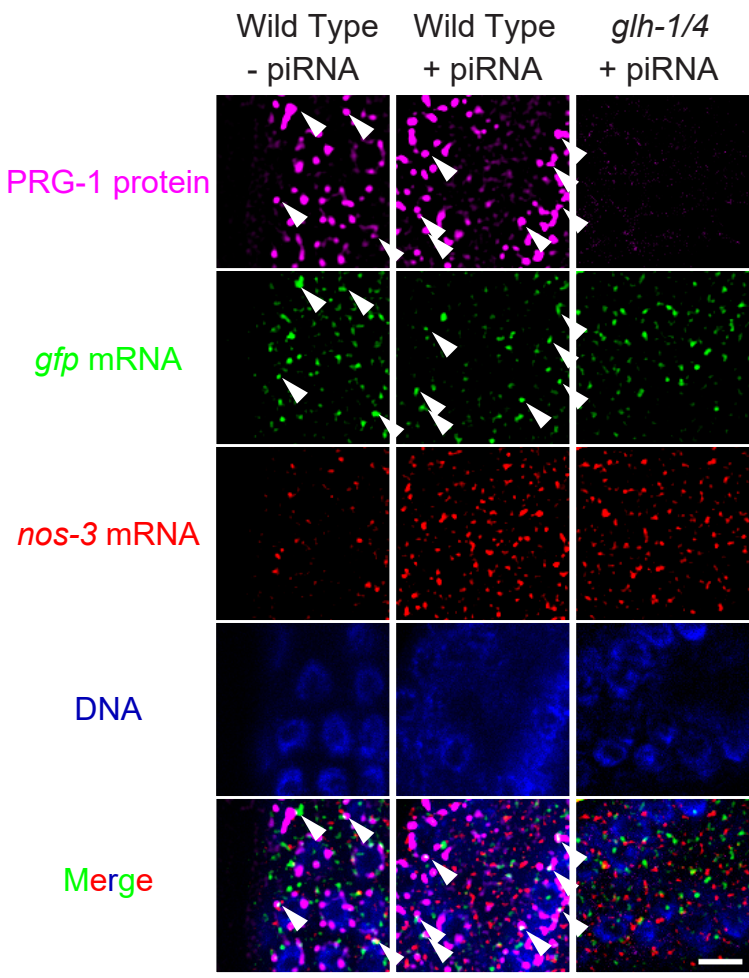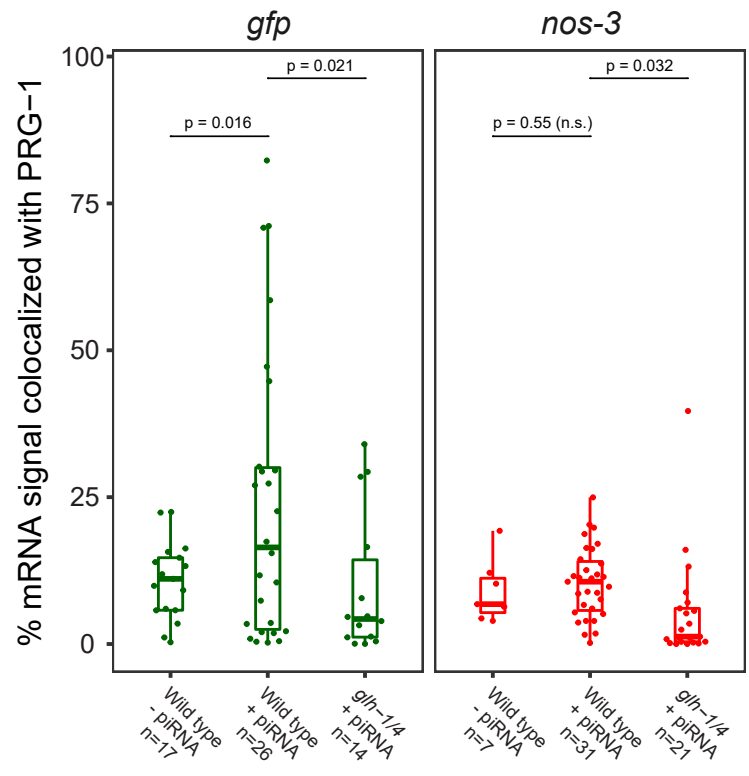

## Supplementary Fig. 2. Image analyses corresponding to Figure 2B

- a) Granule density, size, and intensity quantification of GFP::PRG-1 and GFP::WAGO-4 in the indicated genotypes, corresponding to micrographs in Figure 2b and 3a. Statistical analysis was performed using a one-way ANOVA and Tukey's correction for multiple comparisons were used. Bars indicate the mean, errors bars indicate the standard deviation, and data points indicate values for individual worms (density) or granules (size and intensity) from each genotype. N values indicate number of worms (density) or granules (size and intensity) examined.
- b) Single nuclei from micrographs presented in Figure 2b. Bar, 2 micrometers.
- c) Colocalization analysis of mRNA signal (*gfp* and *nos-3*) with PRG-1 signal. An example single z-slice image from each genotype is presented to the left. Arrowheads indicate pixels showing *gfp* mRNA signal colocalizing with PRG-1 signal. Colocalized pixels are highlighted in white in the merged image. Bar, 5 micrometers. Quantification is shown to the right. Each dot represents a z-series from a single gonad of the indicated genotype, probed under the indicated conditions. Data points represent biological replicates in two independent experiments. Statistical analysis was performed using a two-tailed Student's t-test. For all boxplots, lines display median values, boxes display first and third quartiles, and whiskers display 5<sup>th</sup> and 95<sup>th</sup> percentiles.

**a**

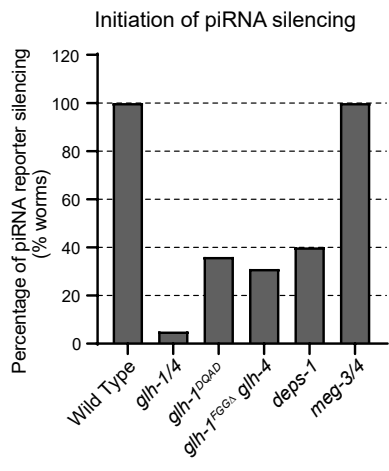

**Supplementary Fig. 3. Mutants with defects in PRG-1 perinuclear condensates exhibit defects in triggering piRNA silencing**

- a) The percentage of F2 generation worms that exhibit silencing of a GFP transgene in the indicated strains. For *meg-3 meg-4* mutants, n = 14. For all other strains, n > 50.



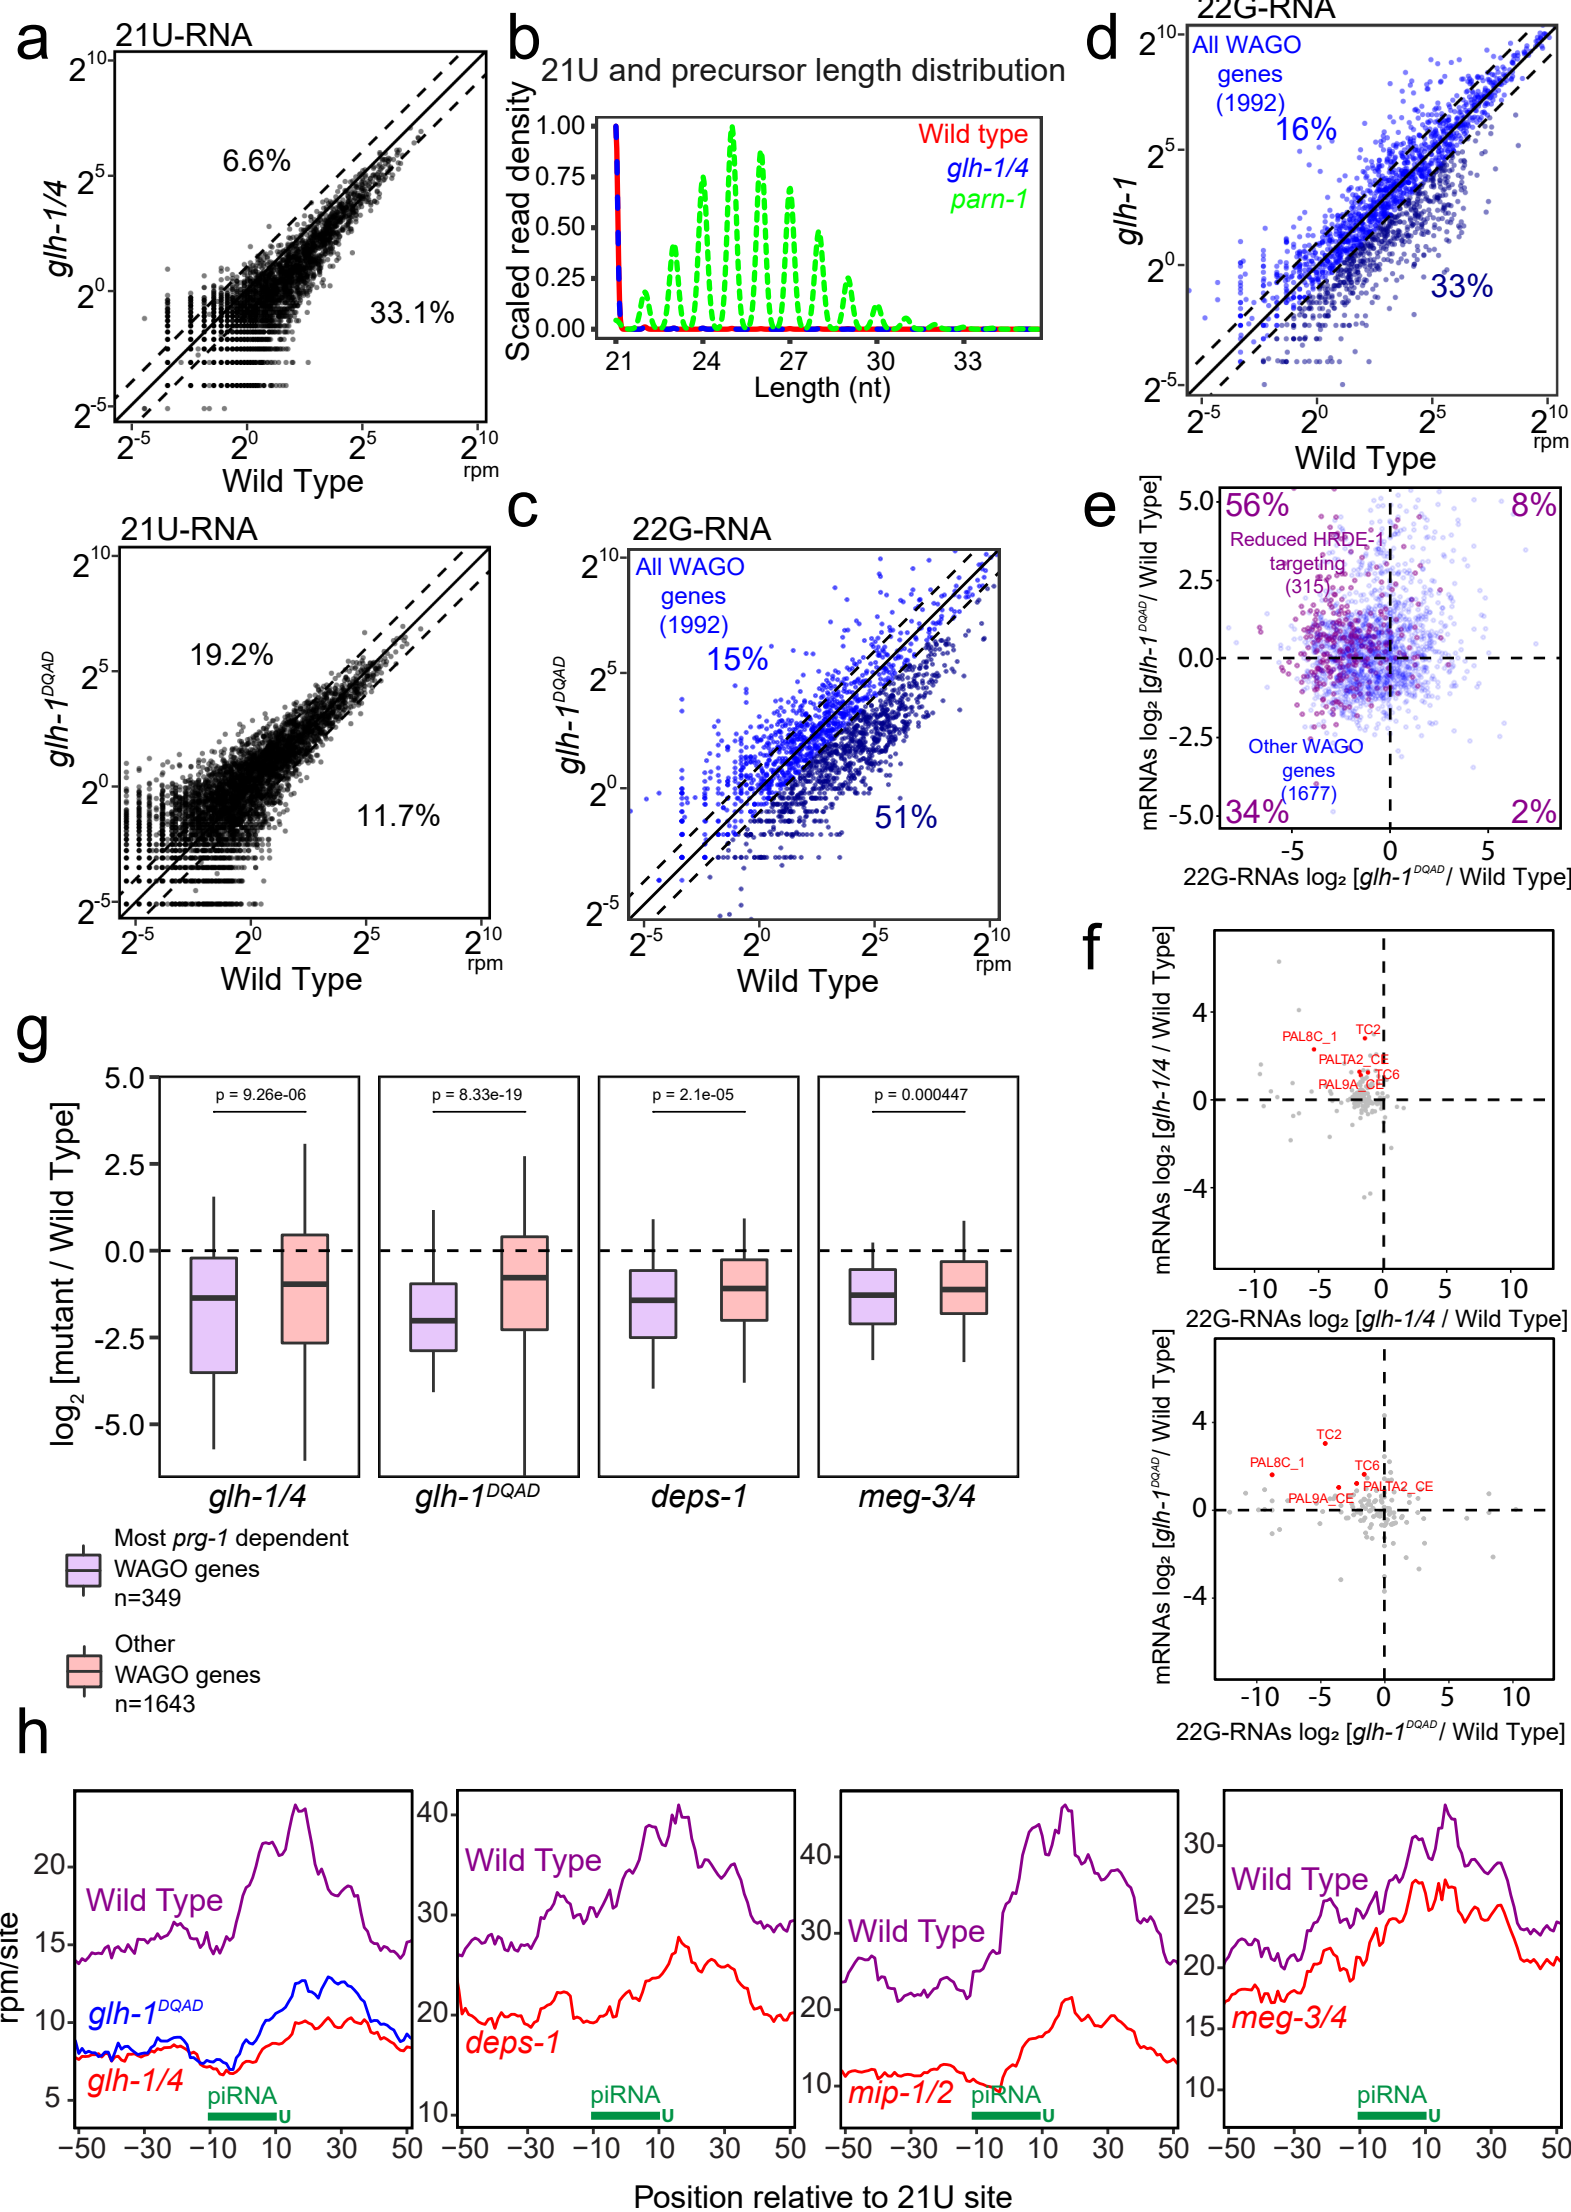

**Supplementary Fig. 4. GLH/VASA mutants exhibit defects in producing secondary WAGO-22G-RNAs (Corresponding to Figure 4)**

- a) A scatter plot showing the abundance of each piRNA (21U-RNA) in *glh-1 glh-4* and *glh-1 DQAD* mutant worms compared to wild type. Diagonal lines indicate a two-fold increase (top), no change (middle), or a two-fold depletion (bottom) in the indicated mutant strains. Percentages indicate the proportion of piRNAs increased or decreased 2-fold compared to wild type.
- b) Scaled kernel density estimation of mature piRNAs (21nt) and their precursors (>21nt) in the indicated strains.
- c-d) Scatter plots showing the abundance of all 22G-RNAs mapped to each WAGO targets in wild type worms compared to the indicated mutants. The percentage of WAGO targets with 2-fold increased or decreased 22G-RNAs in mutants are shown. Diagonal lines indicate a two-fold increase (top), no change (middle), or a two-fold depletion (bottom) in the mutant.
- e) A scatter plot showing the mRNA vs 22G-RNA expression changes for WAGO targets in *glh-1 DQAD* mutants vs wild type worms. Percentages indicate the proportion of WAGO targets with reduced HRDE-1-associated 22G-RNAs that fall in that quadrant.
- f) A scatter plot showing the mRNA vs 22G-RNA expression changes for transposon mRNA in the indicated mutants vs wild type worms. Transposons with increased mRNAs and decreased 22G-RNAs in both *glh-1 glh-4* and *glh-1 DQAD* mutants are highlighted in red. 22G-RNA data reflect data collected from a single experiment. mRNA data reflect data collected across 2 biological replicates.

- g) 22G-RNA fold changes for WAGO targets most dependent on *prg-1* for 22G-RNA accumulation in the indicated mutants compared to wild type. Most *prg-1* dependent WAGO targets defined as those WAGO targets with a significant (adjusted  $P < 0.05$  [see Methods for details] and 2-fold) decrease in 22G-RNA accumulation in *prg-1* mutants. Statistical analysis was performed using a two-tailed Mann-Whitney Wilcoxon test. For all boxplots, lines display median values, boxes display first and third quartiles, and whiskers display 5<sup>th</sup> and 95<sup>th</sup> percentiles.
- h) Density of 22G-RNAs within a 100 nt window around predicted piRNA target sites in the indicated strains. Computed by summing 22G-RNA density per piRNA targeting site in all WAGO targets. Plots are centered on the 10<sup>th</sup> nucleotide of piRNAs.

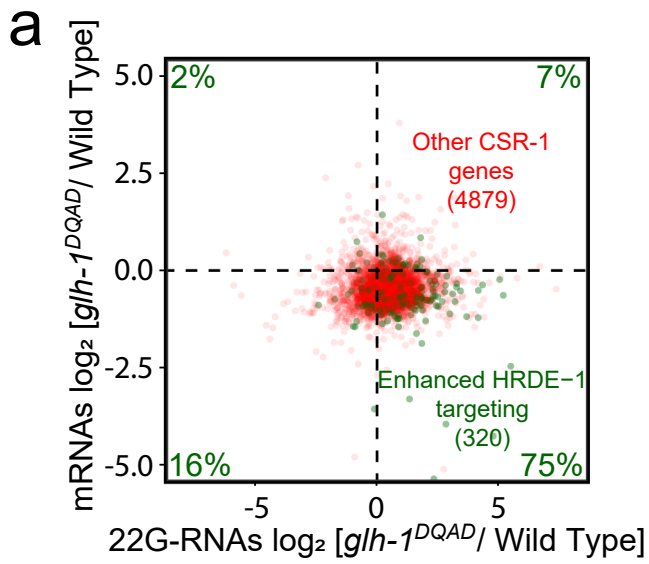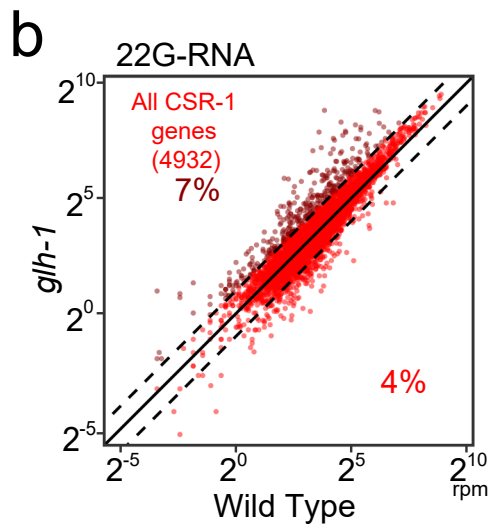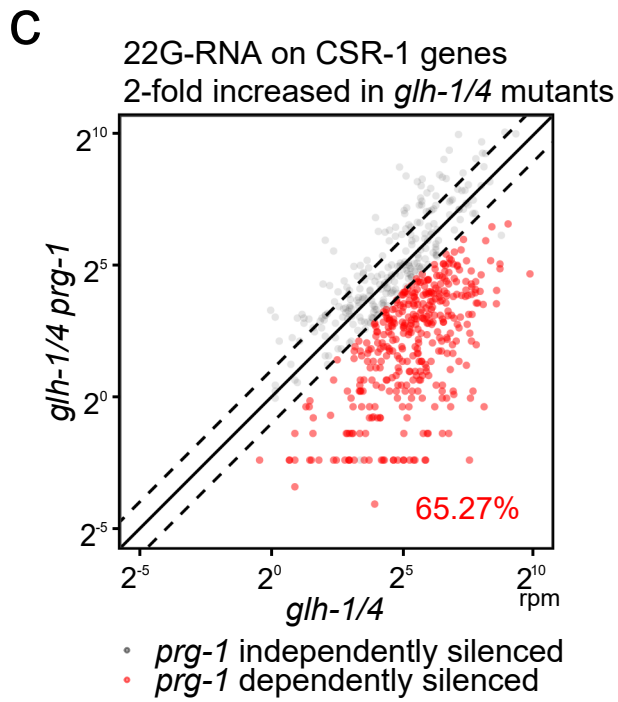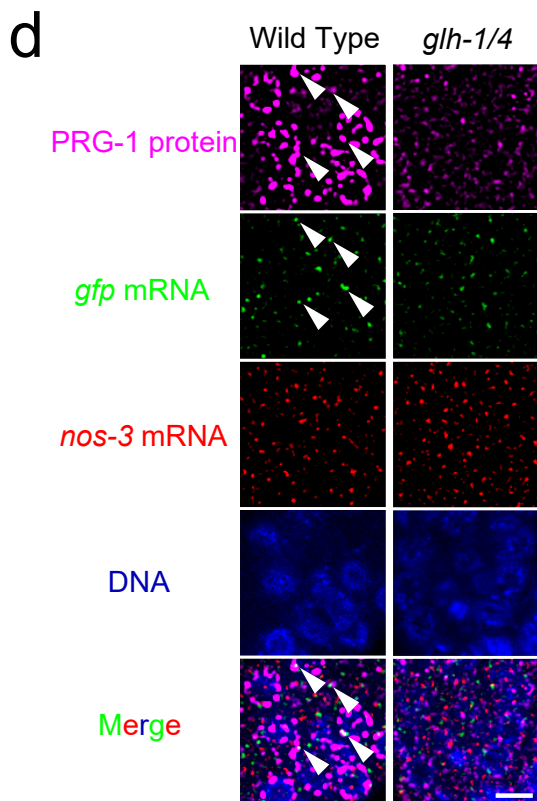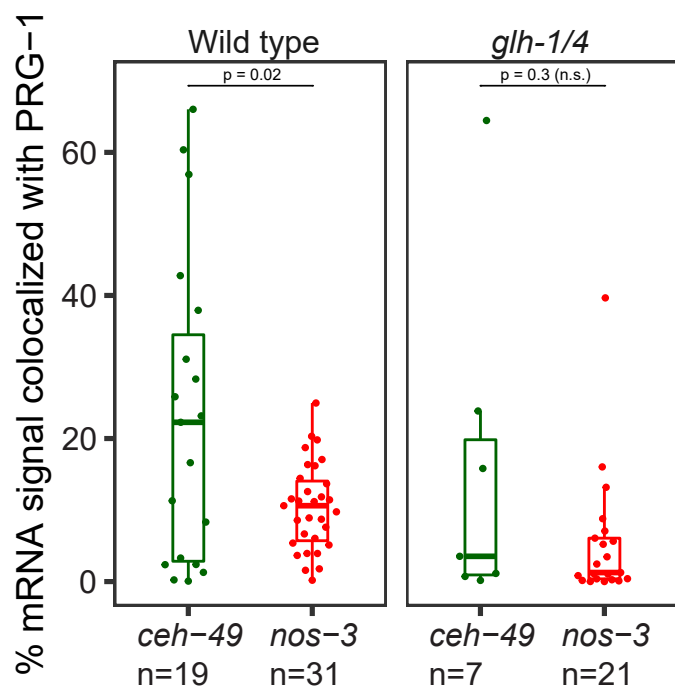

**Supplementary Fig. 5. Many functional germline genes are silenced in mutants with defects in forming perinuclear PRG-1 granules (Corresponding to Figure 5)**

- a) A scatter plot showing the mRNA vs 22G-RNA  $\log_2$  expression changes for CSR-1 targets in *glh-1 DQAD* mutants vs wild type worms. The bottom right quadrant corresponds to CSR-1 targets that have become silenced in the mutant (decreased mRNAs and increased 22G-RNAs). Percentages are shown in each quadrant to indicate the proportion of CSR-1 targets with enhanced HRDE-1-associated 22G-RNAs in the *glh-1* mutant that fall in that quadrant.
- b) A scatter plot showing the abundance of all 22G-RNAs mapped to each CSR-1 targets in wild type worms compared to *glh-1* mutants. The percentage of CSR-1 targets with 2-fold increased or decreased 22G-RNAs in mutants are shown. The three diagonal lines indicate a two-fold increase (top), no change (middle), or a two-fold depletion (bottom) in *glh-1* mutants.
- c) A scatter plot showing 22G-RNA accumulation on CSR-1 genes with a 2-fold increase in 22G-RNA accumulation in *glh-1 glh-4* mutants. The *glh-1 glh-4 prg-1* triple mutant is compared to the *glh-1 glh-4* double mutant. In red, enhanced CSR-1 targets that are suppressed by *prg-1* loss are shown. The three diagonal lines indicate a two-fold increase (top), no change (middle), or a two-fold depletion (bottom) in the indicated mutant strains. Distributions represent data collected across 2 biological replicates.
- d) Colocalization analysis of mRNA signal (*ceh-49* and *nos-3*) with PRG-1 signal. An example single z-slice image from each genotype is presented to the left. Arrowheads indicate pixels showing *ceh-49* mRNA signal colocalizing

with PRG-1 signal. Colocalized pixels are highlighted in white in the merged image. Bar, 5 micrometers. Quantification is shown to the right. Each dot represents a z-series from a single gonad of the indicated genotype, probed under the indicated conditions. Data points represent biological replicates in two independent experiments. Statistical analysis was performed using a two-tailed Student's t-test. For all boxplots, lines display median values, boxes display first and third quartiles, and whiskers display 5<sup>th</sup> and 95<sup>th</sup> percentiles.

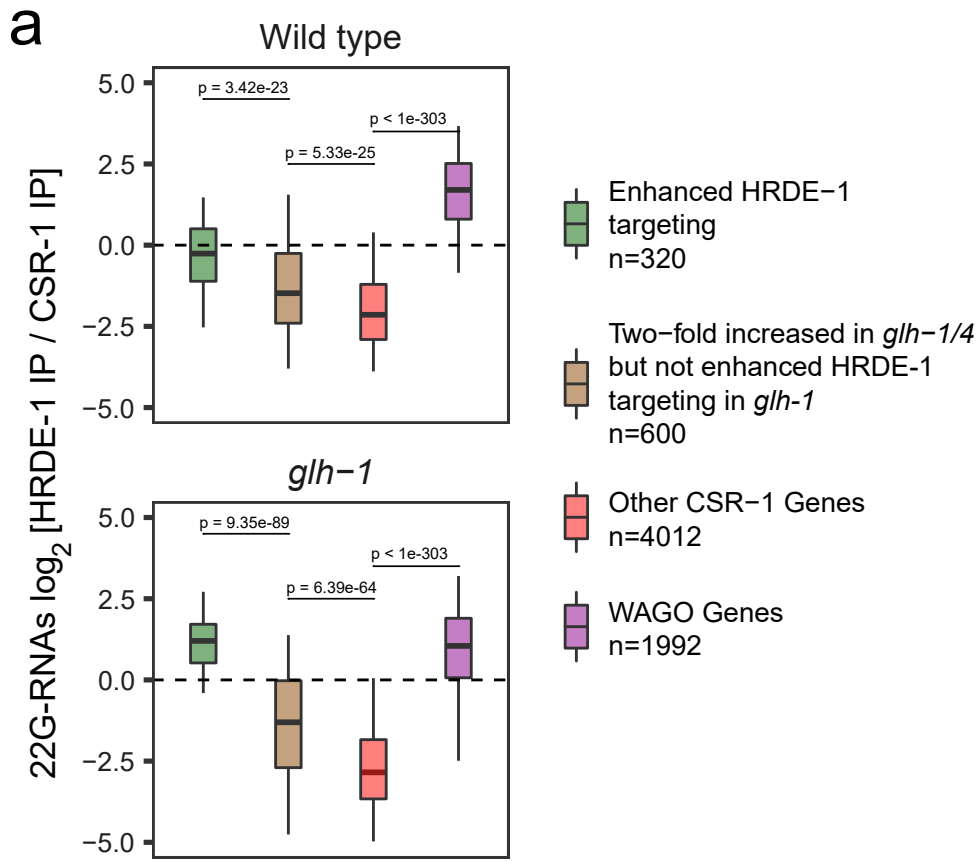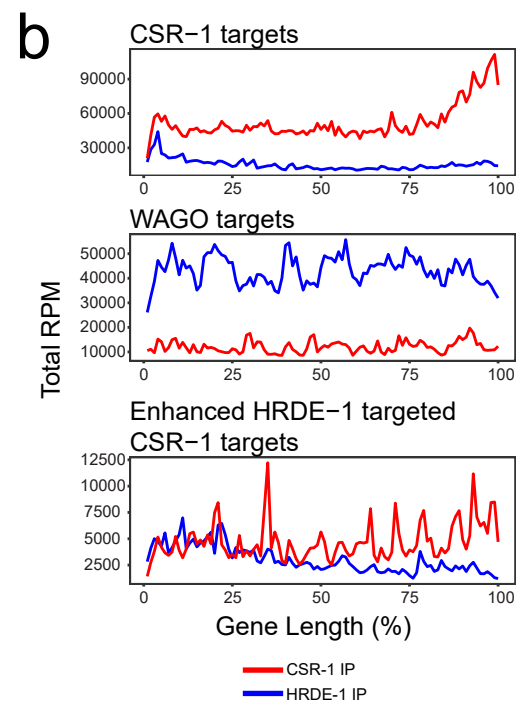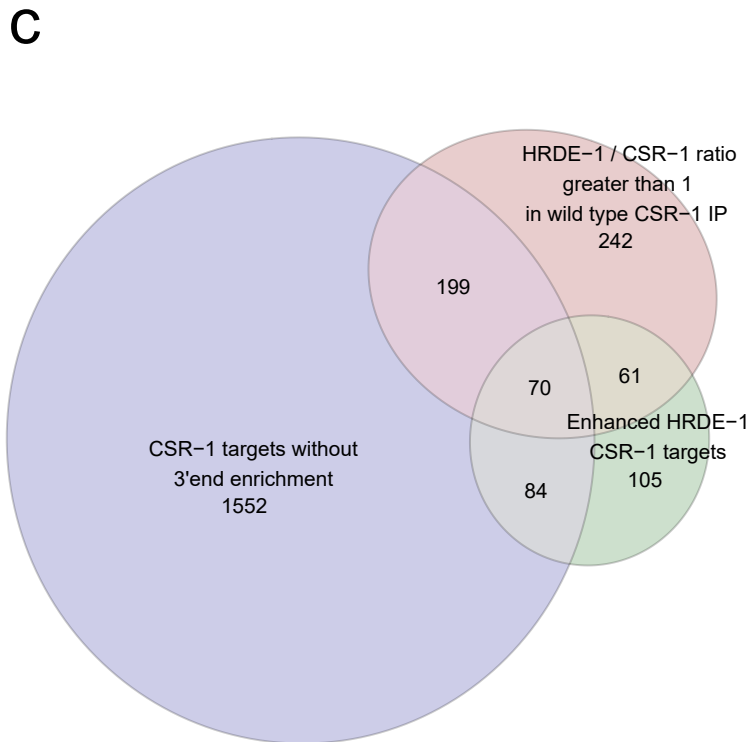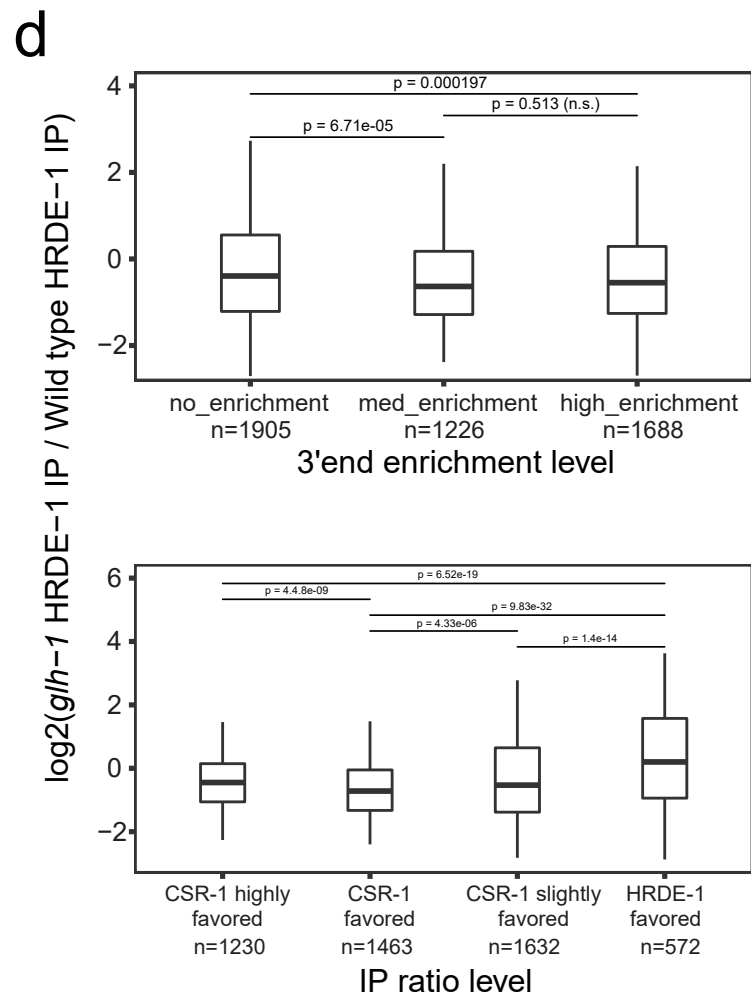

**Supplementary Fig. 6. HRDE-1 / CSR-1 IP ratio and CSR-1 IP 3' end enrichment are both associated with enhanced HRDE-1 targeting of CSR-1 genes in VASA mutants.**

- a) 22G-RNA enrichment in HRDE-1 versus CSR-1 IP experiments in the indicated strains for CSR-1 targets and WAGO targets. Dotted line indicates no enrichment for either Argonaute. Statistical analysis was performed using a two-tailed Mann-Whitney Wilcoxon test. For all boxplots, lines display median values, boxes display first and third quartiles, and whiskers display 5<sup>th</sup> and 95<sup>th</sup> percentiles. Distributions represent data collected across 2 biological replicates for CSR-1 IP and a single experiment for HRDE-1 IP.
- b) Metagene traces showing the total accumulation of 22G-RNAs by percentage of gene length in IP experiments. Traces are shown for three classes of genes: all CSR-1 targets (left), all WAGO targets (middle), and CSR-1 targets with enhanced HRDE-1 targeting (right). Traces from CSR-1 IP experiments are shown in red and traces from HRDE-1 IP experiments are shown in blue.
- c) Venn diagram showing the overlap between CSR-1 targets that fail to show a 3' end enrichment in wild type CSR-1 IP (see Methods), CSR-1 targets with a HRDE-1 to CSR-1 IP ratio greater than 1, and CSR-1 targets with enhanced HRDE-1 targeting in *glh-1* mutants.
- d) Characterization of the effect of CSR-1 22G-RNA 3' end enrichment on the level of HRDE-1 enhancement in *glh-1* mutants (top), and the effect of HRDE-1 to CSR-1 IP ratio on the level of HRDE-1 enhancement in *glh-1* mutants (bottom). For 3' end enrichment and HRDE-1 to CSR-1 IP ratio characterization, see Methods. Statistical analysis was performed using a two-tailed Mann-Whitney Wilcoxon test. For all boxplots, lines display median



values, boxes display first and third quartiles, and whiskers display 5<sup>th</sup> and 95<sup>th</sup> percentiles. Distributions represent data collected across 2 biological replicates for CSR-1 IP derived values and a single experiment for HRDE-1 IP derived values.
