# Supplementary material for: GLH/VASA helicases promote germ granule formation to ensure the fidelity of piRNA-mediated transcriptome surveillance
Source: PubMed Central journal article supplement (PMC9463143; doi:10.1038/s41467-022-32880-2), 2022-09-09
Supplement: 41467_2022_32880_MOESM3_ESM.pdf [file 41467_2022_32880_MOESM3_ESM.pdf]

## **Description of Additional Supplementary Files**

File Name: Supplementary Data 1

Description: List of interacting proteins identified by MS with DTME-crosslinking using GLH-1.

File Name: Supplementary Data 2

Description: List of smFISH probes.
